# Supplementary material for: Exploring the complex population structure and admixture of four local Hungarian sheep breeds
Source: Front Genet. 2025 Mar 19;16:1507315. doi: 10.3389/fgene.2025.1507315 (PMC11962792; doi:10.3389/fgene.2025.1507315)
Supplement: Supplementary file 2 [file Table2.xlsx]

## Sheet: Foglio1
Supplementary Table 2. Descriptive statistics for Ho,HE and FROH
Population	O_Het	E_Het	Froh	IC	IC	IC	Quartile	Quartile	Quartile
	Mean	Mean	Mean	O_HET	E_HET	FROH	O_Het	E_Het	Froh
BAT	0.391	0.378	0.022	0.39-0.393	0.376-0.379	0.027-0.033	4	4	1
BHC	0.388	0.373	0.014	0.386-0.389	0.372-0.375	0.018-0.022	3	4	1
BOR	0.333	0.277	0.197	0.331-0.336	0.275-0.279	0.236-0.276	1	1	4
BWM	0.345	0.326	0.132	0.343-0.347	0.324-0.328	0.17-0.209	2	2	3
CIK	0.408	0.371	0.029	0.406-0.411	0.369-0.373	0.046-0.063	4	4	2
DAL	0.312	0.272	0.286	0.309-0.314	0.27-0.275	0.327-0.368	1	1	4
DLF_1	0.378	0.335	0.111	0.376-0.38	0.333-0.337	0.132-0.153	3	2	3
DLF_2	0.343	0.331	0.14	0.341-0.345	0.329-0.332	0.164-0.188	1	2	4
DLW	0.411	0.373	0.011	0.409-0.413	0.371-0.375	0.021-0.031	4	4	1
FIN	0.366	0.367	0.027	0.365-0.368	0.365-0.368	0.043-0.059	2	3	1
FJA	0.285	0.271	0.445	0.283-0.287	0.269-0.273	0.523-0.602	1	1	4
GAL	0.36	0.341	0.062	0.358-0.362	0.339-0.343	0.074-0.086	2	2	2
GOR	0.427	0.383	0.004	0.425-0.43	0.381-0.385	0.011-0.017	4	4	1
GOT	0.352	0.331	0.088	0.35-0.354	0.329-0.333	0.1-0.111	2	2	3
GUT	0.323	0.288	0.202	0.321-0.325	0.286-0.291	0.221-0.24	1	1	4
HLR	0.375	0.352	0.064	0.373-0.377	0.35-0.353	0.073-0.082	3	3	3
HMF	0.341	0.312	0.136	0.339-0.343	0.31-0.314	0.166-0.196	1	1	4
HRR	0.366	0.356	0.061	0.365-0.368	0.355-0.358	0.069-0.078	2	3	2
ICL	0.342	0.341	0.063	0.34-0.343	0.339-0.342	0.08-0.098	1	2	2
KAM	0.409	0.387	0.004	0.407-0.412	0.385-0.389	0.035-0.066	4	4	1
KLO	0.344	0.284	0.259	0.342-0.347	0.282-0.286	0.292-0.326	2	1	4
LLW	0.375	0.343	0.075	0.373-0.377	0.341-0.345	0.088-0.1	3	2	3
LLY	0.4	0.358	0.027	0.398-0.402	0.356-0.36	0.034-0.041	4	3	1
MER	0.374	0.389	0.046	0.372-0.375	0.384 -0.387	0.030 - 0.062	3	4	2
MIR	0.349	0.389	0.201	0.346 – 0.351	0.299 -0.303	-0.063 - 0.1924	4	4	4
NSP	0.361	0.367	0.039	0.36-0.363	0.365-0.368	0.087-0.135	2	3	2
NWI	0.381	0.359	0.029	0.38-0.383	0.357-0.361	0.037-0.045	3	3	2
OUE	0.266	0.251	0.314	0.264-0.268	0.249-0.253	0.361-0.408	1	1	4
RAK	0.412	0.358	0.048	0.41-0.415	0.356-0.36	0.056-0.065	4	3	2
ROM	0.375	0.344	0.022	0.373-0.377	0.342-0.346	0.031-0.04	3	2	1
SBF	0.378	0.37	0.03	0.376-0.38	0.369-0.372	0.038-0.045	3	4	2
SOA	0.338	0.273	0.137	0.336-0.34	0.271-0.275	0.145-0.153	1	1	4
SWH	0.356	0.344	0.078	0.354-0.358	0.342-0.346	0.088-0.098	2	2	3
SWW	0.379	0.343	0.062	0.377-0.381	0.341-0.345	0.079-0.096	3	2	2
TEX	0.367	0.368	0.064	0.365 – 0.368	0.354 -0.358	0.057 -0.0701	2	3	2
TSI	0.364	0.374	0.066	0.362-0.366	0.373-0.376	0.096-0.126	2	4	3
TWM	0.396	0.354	0.018	0.394-0.398	0.352-0.356	0.03-0.042	4	3	1
VAL	0.404	0.324	0.12	0.401-0.406	0.322-0.326	0.151-0.183	4	1	3
