# Supplementary material for: Exploring the complex population structure and admixture of four local Hungarian sheep breeds
Source: Front Genet. 2025 Mar 19;16:1507315. doi: 10.3389/fgene.2025.1507315 (PMC11962792; doi:10.3389/fgene.2025.1507315)
Supplement: Supplementary file 4 [file Table3.xlsx]

## Sheet: Foglio1
Supplementary Table 3. Pairwise FST and Reynolds’ distance matrices.
	Reynolds
Fst-pairwise	TEX	MER	TWM	SWW	SBF	LLY	LLW	HLR	DLW	BWM	BHC	GAL	ICL	HMF	DLF_2	DLF_1	GOT	GUT	FJA	KLO	DAL	NWI	SWH	NSP	FIN	OUE	ROM	GOR	KAM	VAL	TSI	RAK	HRR	CIK	BAT	SOA	BOR	MIR
MIR		0.225	0.161	0.220	0.241	0.194	0.223	0.247	0.226	0.199	0.270	0.190	0.253	0.236	0.305	0.266	0.261	0.251	0.324	0.362	0.338	0.361	0.195	0.231	0.200	0.191	0.405	0.229	0.187	0.188	0.271	0.177	0.216	0.203	0.196	0.177	0.372	0.362	MIR
BOR	0.304		0.240	0.194	0.228	0.251	0.195	0.237	0.255	0.237	0.217	0.274	0.198	0.259	0.244	0.309	0.270	0.274	0.272	0.331	0.375	0.352	0.374	0.202	0.242	0.215	0.208	0.415	0.253	0.235	0.218	0.312	0.207	0.265	0.242	0.237	0.201	0.247	BOR
SOA	0.310	0.219		0.254	0.211	0.247	0.268	0.211	0.255	0.272	0.254	0.235	0.290	0.216	0.271	0.252	0.321	0.284	0.289	0.285	0.338	0.381	0.359	0.380	0.215	0.254	0.229	0.222	0.413	0.267	0.250	0.237	0.325	0.224	0.279	0.258	0.255	0.217	SOA
BAT	0.162	0.182	0.195		0.095	0.052	0.097	0.110	0.081	0.087	0.106	0.096	0.072	0.131	0.072	0.104	0.116	0.145	0.128	0.115	0.119	0.169	0.185	0.181	0.195	0.063	0.110	0.079	0.076	0.229	0.087	0.060	0.038	0.129	0.068	0.091	0.096	0.072	BAT
CIK	0.178	0.211	0.225	0.069		0.122	0.053	0.112	0.128	0.092	0.113	0.130	0.116	0.083	0.154	0.086	0.142	0.134	0.190	0.156	0.145	0.138	0.199	0.222	0.213	0.234	0.083	0.127	0.093	0.090	0.270	0.125	0.059	0.065	0.139	0.070	0.087	0.092	CIK
HRR	0.183	0.215	0.227	0.091	0.088		0.143	0.080	0.133	0.149	0.112	0.135	0.150	0.136	0.107	0.170	0.107	0.160	0.153	0.205	0.173	0.164	0.155	0.208	0.225	0.223	0.234	0.103	0.146	0.114	0.112	0.263	0.142	0.065	0.091	0.142	0.081	0.012	HRR
RAK	0.194	0.232	0.243	0.087	0.083	0.012		0.139	0.073	0.131	0.149	0.107	0.131	0.150	0.133	0.101	0.176	0.102	0.161	0.154	0.214	0.173	0.164	0.158	0.224	0.248	0.242	0.258	0.101	0.146	0.111	0.107	0.299	0.142	0.058	0.084	0.148	0.076	RAK
TSI	0.162	0.187	0.200	0.065	0.067	0.078	0.073		0.113	0.054	0.105	0.118	0.086	0.105	0.117	0.105	0.076	0.138	0.080	0.130	0.125	0.172	0.143	0.133	0.128	0.179	0.193	0.191	0.205	0.075	0.120	0.089	0.086	0.232	0.117	0.048	0.060	0.123	TSI
VAL	0.237	0.268	0.278	0.121	0.130	0.132	0.137	0.115		0.174	0.116	0.168	0.189	0.144	0.169	0.191	0.174	0.145	0.217	0.140	0.195	0.193	0.249	0.214	0.205	0.201	0.268	0.306	0.283	0.308	0.142	0.186	0.150	0.147	0.352	0.182	0.115	0.129	VAL
KAM	0.171	0.196	0.211	0.037	0.063	0.087	0.081	0.058	0.121		0.080	0.044	0.087	0.105	0.069	0.073	0.096	0.084	0.056	0.126	0.058	0.087	0.116	0.135	0.120	0.108	0.119	0.185	0.203	0.195	0.214	0.051	0.109	0.073	0.075	0.258	0.113	0.050	KAM
GOR	0.170	0.209	0.221	0.059	0.057	0.063	0.056	0.047	0.108	0.049		0.110	0.046	0.101	0.119	0.078	0.102	0.120	0.104	0.070	0.143	0.073	0.132	0.122	0.185	0.148	0.136	0.128	0.195	0.217	0.210	0.231	0.072	0.116	0.080	0.078	0.270	0.111	GOR
ROM	0.205	0.223	0.234	0.084	0.117	0.132	0.132	0.111	0.167	0.107	0.105		0.148	0.109	0.146	0.163	0.126	0.149	0.166	0.150	0.123	0.185	0.122	0.176	0.145	0.219	0.182	0.172	0.161	0.216	0.236	0.231	0.247	0.111	0.139	0.110	0.097	0.287	ROM
OUE	0.333	0.340	0.338	0.205	0.236	0.232	0.258	0.207	0.297	0.227	0.236	0.249		0.274	0.211	0.266	0.290	0.237	0.275	0.296	0.273	0.262	0.313	0.236	0.290	0.283	0.344	0.299	0.315	0.297	0.361	0.412	0.378	0.402	0.239	0.280	0.258	0.241	OUE
FIN	0.174	0.188	0.199	0.073	0.086	0.106	0.102	0.082	0.136	0.072	0.075	0.092	0.214		0.105	0.078	0.111	0.127	0.091	0.110	0.126	0.113	0.084	0.146	0.086	0.136	0.105	0.177	0.145	0.134	0.122	0.175	0.192	0.189	0.202	0.068	0.098	0.070	FIN
NSP	0.181	0.194	0.205	0.076	0.089	0.108	0.105	0.086	0.140	0.070	0.077	0.104	0.227	0.067		0.111	0.079	0.106	0.122	0.086	0.106	0.126	0.110	0.078	0.145	0.079	0.134	0.076	0.179	0.146	0.134	0.124	0.188	0.200	0.194	0.218	0.069	0.034	NSP
SWH	0.206	0.215	0.224	0.105	0.119	0.135	0.136	0.113	0.169	0.103	0.109	0.130	0.244	0.094	0.034		0.143	0.110	0.138	0.155	0.118	0.140	0.160	0.143	0.113	0.176	0.111	0.164	0.096	0.208	0.176	0.167	0.160	0.217	0.230	0.215	0.244	0.101	SWH
NWI	0.178	0.183	0.194	0.061	0.080	0.098	0.096	0.072	0.132	0.050	0.069	0.105	0.213	0.066	0.067	0.096		0.074	0.065	0.079	0.105	0.069	0.076	0.101	0.088	0.065	0.127	0.044	0.093	0.109	0.142	0.120	0.110	0.122	0.178	0.196	0.186	0.205	NWI
DAL	0.303	0.312	0.316	0.177	0.208	0.208	0.227	0.185	0.265	0.193	0.206	0.219	0.331	0.183	0.196	0.216	0.185		0.234	0.188	0.239	0.262	0.211	0.238	0.260	0.245	0.228	0.284	0.208	0.255	0.249	0.305	0.268	0.270	0.255	0.325	0.363	0.340	DAL
KLO	0.286	0.296	0.302	0.165	0.192	0.199	0.215	0.173	0.246	0.177	0.190	0.207	0.315	0.172	0.176	0.194	0.170	0.288		0.220	0.173	0.221	0.245	0.198	0.221	0.245	0.226	0.211	0.267	0.193	0.239	0.233	0.288	0.252	0.255	0.240	0.309	0.335	KLO
FJA	0.304	0.313	0.317	0.169	0.199	0.201	0.219	0.176	0.263	0.184	0.195	0.210	0.338	0.175	0.182	0.206	0.178	0.305	0.285		0.228	0.177	0.229	0.254	0.201	0.231	0.255	0.234	0.216	0.277	0.197	0.251	0.238	0.306	0.268	0.268	0.250	0.327	FJA
GUT	0.277	0.282	0.287	0.155	0.180	0.188	0.201	0.164	0.235	0.169	0.177	0.195	0.303	0.161	0.171	0.195	0.163	0.277	0.266	0.279		0.211	0.162	0.211	0.233	0.185	0.213	0.231	0.215	0.196	0.256	0.181	0.231	0.223	0.280	0.245	0.238	0.178	GUT
GOT	0.222	0.238	0.248	0.112	0.129	0.144	0.146	0.120	0.182	0.113	0.120	0.149	0.257	0.115	0.117	0.148	0.115	0.225	0.214	0.221	0.163		0.156	0.114	0.155	0.174	0.133	0.153	0.172	0.159	0.134	0.197	0.129	0.177	0.168	0.224	0.189	0.175	GOT
DLF_1	0.230	0.240	0.251	0.109	0.135	0.152	0.152	0.125	0.186	0.102	0.127	0.158	0.270	0.125	0.126	0.154	0.104	0.237	0.225	0.235	0.212	0.160		0.121	0.122	0.149	0.170	0.134	0.128	0.158	0.148	0.132	0.193	0.123	0.138	0.176	0.180	0.162	DLF_1
DLF_2	0.234	0.237	0.247	0.120	0.144	0.159	0.159	0.134	0.193	0.113	0.137	0.166	0.259	0.135	0.136	0.161	0.113	0.235	0.223	0.235	0.217	0.172	0.149		0.137	0.133	0.159	0.176	0.143	0.139	0.167	0.156	0.140	0.198	0.132	0.150	0.183	0.190	DLF_2
HMF	0.263	0.266	0.275	0.135	0.173	0.185	0.193	0.158	0.221	0.126	0.169	0.197	0.291	0.162	0.164	0.188	0.132	0.263	0.250	0.264	0.245	0.201	0.165	0.173		0.148	0.161	0.186	0.204	0.170	0.149	0.184	0.174	0.170	0.224	0.157	0.138	0.218	HMF
ICL	0.211	0.217	0.223	0.110	0.126	0.142	0.143	0.118	0.176	0.109	0.115	0.135	0.246	0.099	0.073	0.092	0.103	0.220	0.208	0.212	0.200	0.155	0.161	0.167	0.196		0.152	0.116	0.144	0.162	0.122	0.147	0.163	0.149	0.119	0.180	0.118	0.174	ICL
GAL	0.223	0.228	0.238	0.099	0.133	0.148	0.148	0.122	0.177	0.084	0.124	0.161	0.252	0.127	0.125	0.151	0.089	0.225	0.212	0.222	0.206	0.162	0.129	0.139	0.128	0.159		0.107	0.119	0.137	0.156	0.125	0.098	0.135	0.129	0.119	0.177	0.108	GAL
BHC	0.173	0.180	0.194	0.070	0.082	0.101	0.097	0.077	0.130	0.056	0.071	0.115	0.210	0.082	0.076	0.105	0.043	0.188	0.176	0.179	0.166	0.121	0.116	0.124	0.145	0.111	0.102		0.102	0.070	0.063	0.097	0.070	0.086	0.104	0.089	0.063	0.123	BHC
BWM	0.237	0.240	0.252	0.122	0.143	0.156	0.161	0.129	0.195	0.118	0.133	0.169	0.269	0.136	0.135	0.161	0.119	0.247	0.234	0.242	0.226	0.179	0.175	0.180	0.201	0.165	0.162	0.115		0.167	0.125	0.148	0.167	0.134	0.153	0.172	0.154	0.128	BWM
DLW	0.180	0.195	0.209	0.069	0.079	0.101	0.096	0.073	0.135	0.055	0.067	0.116	0.230	0.081	0.075	0.107	0.063	0.204	0.190	0.195	0.178	0.125	0.124	0.131	0.157	0.112	0.113	0.061	0.121		0.107	0.064	0.087	0.104	0.071	0.091	0.109	0.093	DLW
HLR	0.202	0.211	0.225	0.091	0.109	0.128	0.125	0.100	0.159	0.080	0.099	0.140	0.239	0.106	0.104	0.134	0.084	0.217	0.202	0.208	0.194	0.147	0.138	0.145	0.160	0.139	0.121	0.085	0.143	0.089		0.124	0.096	0.118	0.133	0.102	0.111	0.127	HLR
LLW	0.219	0.225	0.238	0.101	0.122	0.139	0.139	0.110	0.174	0.092	0.113	0.153	0.256	0.118	0.118	0.147	0.096	0.229	0.217	0.225	0.207	0.158	0.147	0.154	0.168	0.151	0.127	0.099	0.158	0.103	0.119		0.136	0.108	0.132	0.149	0.115	0.124	LLW
LLY	0.200	0.211	0.225	0.083	0.107	0.126	0.123	0.100	0.156	0.070	0.097	0.139	0.240	0.104	0.101	0.130	0.073	0.212	0.198	0.206	0.192	0.142	0.120	0.130	0.138	0.137	0.093	0.082	0.142	0.087	0.105	0.116		0.086	0.094	0.113	0.131	0.102	LLY
SBF	0.177	0.177	0.190	0.077	0.087	0.106	0.102	0.082	0.134	0.067	0.075	0.118	0.211	0.087	0.082	0.112	0.067	0.190	0.179	0.182	0.169	0.125	0.125	0.134	0.157	0.115	0.118	0.068	0.125	0.069	0.097	0.109	0.097		0.115	0.075	0.096	0.110	SBF
SWW	0.214	0.222	0.235	0.105	0.120	0.138	0.138	0.111	0.172	0.099	0.112	0.151	0.252	0.119	0.115	0.143	0.099	0.231	0.218	0.224	0.208	0.159	0.156	0.161	0.185	0.150	0.144	0.092	0.154	0.099	0.125	0.138	0.123	0.104		0.146	0.106	0.090	SWW
TWM	0.197	0.204	0.219	0.093	0.106	0.125	0.123	0.100	0.155	0.083	0.096	0.136	0.234	0.105	0.101	0.129	0.076	0.212	0.198	0.204	0.190	0.143	0.139	0.147	0.170	0.134	0.128	0.061	0.138	0.083	0.111	0.124	0.107	0.092	0.086		0.129	0.093	TWM
MER	0.148	0.176	0.190	0.050	0.052	0.077	0.071	0.053	0.109	0.043	0.045	0.103	0.190	0.075	0.076	0.104	0.063	0.171	0.159	0.162	0.149	0.107	0.115	0.125	0.148	0.110	0.113	0.068	0.117	0.062	0.091	0.102	0.090	0.073	0.101	0.089		0.104	MER
TEX	0.201	0.213	0.224	0.091	0.115	0.133	0.130	0.107	0.160	0.077	0.104	0.138	0.239	0.100	0.105	0.133	0.072	0.209	0.198	0.204	0.190	0.145	0.114	0.128	0.138	0.141	0.102	0.097	0.154	0.102	0.116	0.127	0.082	0.109	0.136	0.121	0.099		TEX
	MIR	BOR	SOA	BAT	CIK	HRR	RAK	TSI	VAL	KAM	GOR	ROM	OUE	FIN	NSP	SWH	NWI	DAL	KLO	FJA	GUT	GOT	DLF_1	DLF_2	HMF	ICL	GAL	BHC	BWM	DLW	HLR	LLW	LLY	SBF	SWW	TWM	MER	TEX
* all p-values >0.00001
Highlighted in yellow: Hungarian breeds analysed in this study
