# Supplementary material for: Exploring the complex population structure and admixture of four local Hungarian sheep breeds
Source: Front Genet. 2025 Mar 19;16:1507315. doi: 10.3389/fgene.2025.1507315 (PMC11962792; doi:10.3389/fgene.2025.1507315)
Supplement: Supplementary file 11 [file Table6.xlsx]

## Sheet: Foglio1
Supplementary Table 4. GONE Ne estimates considering the first 10 generations
breed	generations	Ne estimates	breed	generations	Ne estimates	breed	generations	Ne estimates	breed	generations	Ne estimates	breed	generations	Ne estimates
CIK	1	724	HRR	1	178	RAK	1	100	TSI	1	141	BAT	1	825
CIK	2	724	HRR	2	178	RAK	2	100	TSI	2	141	BAT	2	825
CIK	3	724	HRR	3	178	RAK	3	100	TSI	3	141	BAT	3	825
CIK	4	724	HRR	4	178	RAK	4	100	TSI	4	141	BAT	4	825
CIK	5	731	HRR	5	187	RAK	5	110	TSI	5	145	BAT	5	516
CIK	6	674	HRR	6	191	RAK	6	110	TSI	6	145	BAT	6	516
CIK	7	66	HRR	7	193	RAK	7	112	TSI	7	130	BAT	7	516
CIK	8	719	HRR	8	194	RAK	8	112	TSI	8	131	BAT	8	516
CIK	9	114	HRR	9	209	RAK	9	115	TSI	9	131	BAT	9	591
CIK	10	388	HRR	10	214	RAK	10	112	TSI	10	128	BAT	10	593
