# Supplementary material for: Exploring the complex population structure and admixture of four local Hungarian sheep breeds
Source: Front Genet. 2025 Mar 19;16:1507315. doi: 10.3389/fgene.2025.1507315 (PMC11962792; doi:10.3389/fgene.2025.1507315)
Supplement: Supplementary file 13 [file Table4.xlsx]

## Sheet: Foglio1
Supplementary Table 4. Admixture proportions for the hungarian breeds analysed in this study.
FID	IID	V1	V2	V3	V4	V5	V6	V7	V8	V9	V10	V11	V12	V13	V14	V15	V16	V17	V18	V19	V20	V21	V22	V23	V24	V25	V26	V27	V28	V29	V30	V31
BAT	HUOA-BAT-000005601	0	0.009	0.001	0.051	0	0.016	0.002	0.053	0	0	0.013	0.784	0.035	0	0	0	0.016	0	0	0	0.009	0	0.001	0.005	0	0	0.003	0	0	0	0
BAT	HUOA-BAT-000005602	0.001	0.001	0.015	0	0.005	0	0	0.023	0	0	0	0.905	0.002	0.011	0	0	0	0.008	0	0	0	0	0	0	0.005	0.002	0.009	0.003	0.009	0	0
BAT	HUOA-BAT-000005603	0	0	0	0.008	0.002	0.018	0	0	0	0	0	0.86	0	0	0	0	0	0.002	0	0.004	0	0	0	0	0.001	0	0	0	0.104	0.001	0
BAT	HUOA-BAT-000005604	0	0	0	0	0	0	0	0	0	0	0	0.806	0	0	0	0	0	0	0	0	0	0	0	0.007	0	0	0	0	0.186	0	0
BAT	HUOA-BAT-000005605	0	0	0	0.189	0	0	0.005	0.064	0.004	0	0.001	0.626	0.069	0	0	0.008	0.017	0	0	0	0	0	0	0	0.008	0	0.002	0	0	0.006	0
BAT	HUOA-BAT-000005606	0.002	0.005	0	0.081	0.007	0.008	0	0.013	0	0	0	0.587	0.005	0.028	0.013	0	0.011	0.005	0	0	0	0.01	0.003	0	0.012	0.012	0.004	0.004	0.18	0.011	0
BAT	HUOA-BAT-000005608	0	0	0	0	0	0	0	0	0	0	0	0.932	0	0	0.003	0	0	0	0	0	0	0	0	0	0	0	0	0	0.065	0	0
BAT	HUOA-BAT-000005609	0	0.002	0.002	0.169	0	0.003	0	0.066	0.017	0	0	0.548	0.041	0	0.006	0.027	0.06	0	0	0	0	0.009	0	0	0.011	0.01	0.004	0.005	0.01	0.01	0
BAT	HUOA-BAT-000005610	0	0.006	0.011	0.029	0.007	0.012	0	0.002	0.001	0	0.002	0.797	0	0	0	0.024	0	0	0	0.001	0	0.006	0.024	0	0	0.005	0.006	0	0.062	0.004	0
BAT	HUOA-BAT-000005611	0	0	0	0.081	0	0.002	0.019	0.023	0.011	0	0.014	0.669	0.008	0	0.002	0.023	0.018	0.007	0.009	0	0	0.005	0.004	0	0.006	0.015	0.011	0	0.07	0	0
BAT	HUOA-BAT-000005612	0	0	0	0	0	0	0	0	0	0	0	0.95	0	0	0	0	0	0	0	0	0	0	0	0	0	0	0	0	0.049	0	0
BAT	HUOA-BAT-000005613	0.002	0.007	0	0	0	0.01	0	0.003	0.001	0.005	0	0.805	0.022	0	0	0	0	0	0	0.002	0	0	0	0.004	0.004	0.011	0	0	0.126	0	0
BAT	HUOA-BAT-000005614	0	0	0	0.016	0.005	0.011	0.01	0.005	0	0.018	0	0.791	0	0	0	0.017	0	0.014	0	0	0	0	0	0	0	0	0.006	0	0.1	0	0.006
BAT	HUOA-BAT-000005615	0	0	0.002	0	0.003	0.004	0	0	0	0	0	0.948	0	0.006	0	0	0	0.008	0.01	0.004	0	0	0	0	0	0	0.004	0	0.011	0	0
BAT	HUOA-BAT-000005616	0	0.011	0.008	0.04	0.014	0	0.011	0.022	0.033	0.001	0	0.757	0.009	0.003	0.001	0	0.04	0.004	0.01	0.006	0	0.006	0	0	0.007	0	0.016	0	0	0	0.002
BAT	HUOA-BAT-000005617	0	0	0	0	0	0	0	0	0	0	0	1	0	0	0	0	0	0	0	0	0	0	0	0	0	0	0	0	0	0	0
BAT	HUOA-BAT-000005618	0	0	0	0	0	0	0	0	0	0	0	0.921	0	0	0	0	0	0	0	0	0	0	0	0.001	0	0	0	0	0.078	0	0
BAT	HUOA-BAT-000005619	0	0	0	0.096	0.007	0	0.013	0.012	0	0	0	0.703	0.013	0	0.005	0	0	0	0.007	0	0	0	0	0.008	0.02	0.005	0	0	0.11	0	0
BAT	HUOA-BAT-000005620	0	0.001	0	0.126	0	0	0.015	0.109	0	0	0.018	0.634	0.049	0	0.005	0	0.021	0	0	0.008	0	0	0	0	0.002	0	0.003	0	0	0.008	0
BAT	HUOA-BAT-000005621	0	0	0	0	0	0	0	0	0	0	0	1	0	0	0	0	0	0	0	0	0	0	0	0	0	0	0	0	0	0	0
BAT	HUOA-BAT-000005622	0.004	0	0.015	0.023	0	0.014	0.005	0.021	0.03	0.012	0	0.796	0.017	0	0	0.003	0	0	0	0.005	0	0.003	0.011	0	0.01	0.003	0.002	0.001	0.023	0.001	0
BAT	HUOA-BAT-000005623	0	0	0	0.06	0.003	0	0.002	0.013	0	0	0	0.769	0	0.016	0.008	0.009	0	0	0	0	0	0	0.013	0.001	0.011	0	0.005	0	0.079	0.01	0
BAT	HUOA-BAT-000005624	0	0	0	0	0	0	0	0	0	0	0	0.982	0.011	0	0	0	0	0	0	0	0	0	0	0	0	0	0	0	0.006	0	0
BAT	HUOA-BAT-000005625	0	0	0.005	0.076	0	0	0	0.026	0	0	0.007	0.751	0.035	0.007	0	0.001	0	0	0	0	0	0.002	0.019	0	0.002	0	0.007	0	0.062	0	0
BAT	HUOA-BAT-000005626	0	0	0	0.123	0	0	0	0.113	0	0	0.022	0.625	0.061	0	0.01	0	0.035	0	0	0	0	0	0	0.002	0.001	0.003	0	0	0	0.005	0
CIK	HUOA-CIK-000011447	0.014	0.022	0	0.379	0.037	0.008	0.069	0	0.011	0.018	0.036	0.057	0	0	0.008	0.171	0.01	0.007	0.023	0	0	0.005	0.024	0	0.01	0	0.004	0.006	0.038	0.004	0.038
CIK	HUOA-CIK-000011448	0.034	0.015	0.025	0.353	0.033	0.004	0.056	0	0	0.022	0.011	0.084	0.001	0.005	0.006	0.158	0.02	0.009	0.017	0.004	0	0.02	0.02	0.006	0.026	0.006	0.015	0.014	0.028	0.007	0.003
CIK	HUOA-CIK-000011449	0.007	0.01	0.022	0.348	0.058	0.018	0.065	0	0	0.03	0.006	0.095	0	0.003	0.003	0.153	0	0.019	0.002	0.009	0.017	0.005	0.021	0.008	0.021	0.002	0.009	0.009	0.028	0.006	0.025
CIK	HUOA-CIK-000011450	0.013	0.015	0.031	0.373	0.047	0	0.075	0	0	0.016	0.029	0.081	0.006	0.013	0	0.147	0	0	0.031	0.009	0.005	0.014	0.008	0	0.017	0.006	0.013	0.004	0.018	0.005	0.023
CIK	HUOA-CIK-000011451	0.014	0.024	0	0.343	0.042	0	0.043	0	0.01	0.03	0.002	0.049	0	0.012	0.014	0.172	0.025	0.001	0.006	0.015	0.033	0.03	0.005	0.002	0.025	0.004	0.017	0.016	0.028	0.006	0.033
CIK	HUOA-CIK-000011452	0	0.018	0	0.371	0.065	0	0.08	0	0.013	0.037	0	0.091	0.004	0.002	0.006	0.138	0	0.005	0.026	0.015	0.01	0.014	0.02	0.005	0.014	0	0.019	0.005	0.027	0.014	0
CIK	HUOA-CIK-000011453	0	0.022	0.012	0.397	0.059	0.007	0.061	0	0.002	0.028	0	0.074	0	0.008	0	0.149	0.012	0.009	0.014	0.014	0.017	0.01	0.005	0	0.019	0.003	0.029	0.003	0.024	0.02	0.001
CIK	HUOA-CIK-000011454	0.011	0.028	0.014	0.385	0.063	0.003	0.065	0	0.021	0.037	0	0.037	0	0.014	0.006	0.155	0	0.005	0.035	0	0.012	0.012	0.018	0	0.006	0.016	0.022	0	0.032	0	0.001
HRR	HUOA-HRR-000005671	0.012	0	0	0.051	0	0	0.029	0	0	0	0	0.012	0	0	0	0.843	0	0	0.004	0.005	0	0.001	0	0.005	0.001	0	0	0	0.013	0	0.024
HRR	HUOA-HRR-000005672	0	0.01	0	0.063	0	0	0.042	0	0	0.01	0.005	0.01	0	0	0.001	0.839	0	0.004	0	0	0	0	0.012	0.003	0	0	0	0	0.002	0	0
HRR	HUOA-HRR-000005673	0	0.001	0	0.035	0.015	0	0.033	0	0	0	0.006	0	0	0.012	0	0.878	0	0	0	0	0	0	0.008	0.005	0	0	0	0.003	0	0	0.004
HRR	HUOA-HRR-000005675	0.011	0	0	0.055	0	0	0.024	0	0	0	0	0	0	0.012	0.022	0.856	0	0.001	0	0	0	0	0	0.005	0	0	0.002	0	0.013	0	0
HRR	HUOA-HRR-000005676	0.01	0	0	0.055	0.021	0.007	0.012	0	0	0	0.004	0.006	0	0	0	0.837	0	0.009	0	0	0.013	0.002	0	0.001	0.003	0	0	0.006	0.015	0	0
HRR	HUOA-HRR-000005677	0.002	0	0	0.046	0	0	0.029	0	0	0	0	0.005	0	0	0	0.887	0.007	0	0	0	0	0	0	0.008	0	0.004	0	0	0.004	0.008	0
HRR	HUOA-HRR-000005678	0	0.002	0	0	0	0	0.028	0	0.007	0	0	0.003	0	0	0	0.934	0	0.005	0	0.003	0	0.005	0	0	0.003	0.009	0	0	0	0	0
HRR	HUOA-HRR-000005679	0	0	0	0	0	0	0.016	0	0	0	0	0	0	0.006	0	0.956	0	0	0	0	0	0.015	0	0	0.007	0	0	0	0	0	0
HRR	HUOA-HRR-000005680	0	0	0	0	0	0	0.036	0	0	0	0	0	0.005	0	0.004	0.941	0	0	0	0	0	0	0	0	0.007	0	0	0.008	0	0	0
HRR	HUOA-HRR-000005681	0	0	0	0	0	0	0.016	0	0	0	0	0	0	0	0	0.984	0	0	0	0	0	0	0	0	0	0	0	0	0	0	0
HRR	HUOA-HRR-000005682	0	0	0	0	0	0	0	0	0	0	0	0	0	0	0	1	0	0	0	0	0	0	0	0	0	0	0	0	0	0	0
HRR	HUOA-HRR-000005683	0	0	0	0	0	0	0	0	0	0	0	0	0	0	0	1	0	0	0	0	0	0	0	0	0	0	0	0	0	0	0
HRR	HUOA-HRR-000005684	0	0	0	0	0	0	0	0	0	0	0	0	0	0	0	1	0	0	0	0	0	0	0	0	0	0	0	0	0	0	0
HRR	HUOA-HRR-000005685	0	0	0	0	0	0	0	0	0	0	0	0	0	0	0	1	0	0	0	0	0	0	0	0	0	0	0	0	0	0	0
HRR	HUOA-HRR-000005686	0	0	0	0	0	0.004	0.002	0	0	0	0	0	0	0	0	0.975	0	0	0	0.003	0	0	0.003	0	0.009	0	0.003	0	0	0	0
HRR	HUOA-HRR-000005687	0	0	0	0	0	0	0	0	0	0	0	0	0	0	0	0.999	0	0	0	0	0	0	0	0	0	0	0	0.001	0	0	0
HRR	HUOA-HRR-000005689	0	0	0	0	0	0	0	0	0	0	0	0	0	0	0	1	0	0	0	0	0	0	0	0	0	0	0	0	0	0	0
HRR	HUOA-HRR-000005690	0	0	0	0	0	0	0	0	0	0	0	0	0	0	0	1	0	0	0	0	0	0	0	0	0	0	0	0	0	0	0
HRR	HUOA-HRR-000005691	0	0	0	0	0	0	0	0	0	0	0	0	0	0	0	1	0	0	0	0	0	0	0	0	0	0	0	0	0	0	0
HRR	HUOA-HRR-000005692	0	0	0	0	0	0.003	0.001	0.005	0	0	0.006	0	0	0	0	0.973	0	0.001	0	0.007	0	0	0	0	0	0	0	0.003	0	0	0
HRR	HUOA-HRR-000005693	0	0	0	0	0	0	0	0	0	0	0	0	0	0	0	1	0	0	0	0	0	0	0	0	0	0	0	0	0	0	0
HRR	HUOA-HRR-000005694	0	0	0	0	0	0	0	0	0	0	0	0	0	0	0	1	0	0	0	0	0	0	0	0	0	0	0	0	0	0	0
HRR	HUOA-HRR-000005695	0	0	0	0	0	0	0	0	0	0	0	0	0	0	0	0.994	0	0	0	0	0	0	0	0.005	0	0	0	0	0	0	0
HRR	HUOA-HRR-000005697	0	0	0	0.022	0.001	0	0	0	0	0	0	0	0	0	0	0.957	0	0	0.017	0	0	0	0	0	0.004	0	0	0	0	0	0
HRR	HUOA-HRR-000005698	0	0	0	0.042	0	0.003	0.024	0	0.004	0.004	0	0.012	0	0	0	0.889	0	0	0	0	0.009	0	0.001	0	0.008	0	0	0.004	0	0	0
RAK	HUOA-RAK-000011466	0.001	0	0.003	0.046	0	0	0.013	0	0	0	0.013	0	0	0.005	0.002	0.871	0	0	0	0	0	0.002	0	0.002	0.002	0	0.003	0.004	0.029	0.003	0
RAK	HUOA-RAK-000011467	0	0	0	0.026	0	0	0.029	0	0	0	0.024	0	0	0	0.016	0.887	0	0	0.007	0	0	0	0	0	0.006	0.005	0	0	0	0	0
RAK	HUOA-RAK-000011468	0	0	0	0.036	0	0	0.024	0	0.003	0	0.02	0	0	0	0.007	0.904	0	0	0.003	0	0	0	0	0	0.003	0	0	0	0	0	0
RAK	HUOA-RAK-000011469	0	0.009	0	0.014	0.026	0	0.012	0	0	0	0	0.004	0	0	0	0.904	0	0	0.009	0	0	0	0.011	0.002	0	0	0	0.007	0	0.003	0
RAK	HUOA-RAK-000011470	0	0	0	0.035	0	0	0.008	0	0.006	0	0	0	0	0.001	0	0.921	0	0.003	0	0.002	0	0	0	0	0	0.001	0.008	0.002	0.013	0	0
RAK	HUOA-RAK-000011471	0	0.007	0	0.022	0.008	0	0.004	0	0.002	0	0	0.001	0.005	0.013	0.015	0.872	0	0.008	0	0.017	0	0.005	0	0	0.003	0	0.006	0	0.012	0	0
TSI	HUOA-TSI-000005503	0	0.001	0.009	0.056	0.03	0	0.749	0.002	0	0.009	0	0.03	0.009	0	0.004	0.073	0	0	0.002	0.006	0	0	0	0	0.008	0	0	0	0.006	0.008	0
TSI	HUOA-TSI-000005504	0	0	0	0	0	0	1	0	0	0	0	0	0	0	0	0	0	0	0	0	0	0	0	0	0	0	0	0	0	0	0
TSI	HUOA-TSI-000005505	0	0	0	0	0	0	1	0	0	0	0	0	0	0	0	0	0	0	0	0	0	0	0	0	0	0	0	0	0	0	0
TSI	HUOA-TSI-000005506	0	0	0	0	0	0	1	0	0	0	0	0	0	0	0	0	0	0	0	0	0	0	0	0	0	0	0	0	0	0	0
TSI	HUOA-TSI-000005507	0	0	0	0	0	0	1	0	0	0	0	0	0	0	0	0	0	0	0	0	0	0	0	0	0	0	0	0	0	0	0
TSI	HUOA-TSI-000005508	0	0	0	0	0	0	1	0	0	0	0	0	0	0	0	0	0	0	0	0	0	0	0	0	0	0	0	0	0	0	0
TSI	HUOA-TSI-000005511	0	0	0	0	0	0	1	0	0	0	0	0	0	0	0	0	0	0	0	0	0	0	0	0	0	0	0	0	0	0	0
TSI	HUOA-TSI-000005512	0	0	0	0	0	0	1	0	0	0	0	0	0	0	0	0	0	0	0	0	0	0	0	0	0	0	0	0	0	0	0
TSI	HUOA-TSI-000005514	0	0	0	0	0	0	1	0	0	0	0	0	0	0	0	0	0	0	0	0	0	0	0	0	0	0	0	0	0	0	0
TSI	HUOA-TSI-000005515	0	0	0	0	0	0	1	0	0	0	0	0	0	0	0	0	0	0	0	0	0	0	0	0	0	0	0	0	0	0	0
TSI	HUOA-TSI-000005516	0	0	0	0	0	0	1	0	0	0	0	0	0	0	0	0	0	0	0	0	0	0	0	0	0	0	0	0	0	0	0
TSI	HUOA-TSI-000005517	0	0.004	0.012	0.164	0.002	0	0.551	0	0	0.012	0	0.031	0	0	0	0.113	0	0	0.025	0.005	0	0.009	0.01	0.01	0.019	0.004	0.007	0.004	0.01	0.011	0
TSI	HUOA-TSI-000005518	0.002	0.004	0.007	0.193	0	0.001	0.479	0	0	0.019	0	0.069	0	0.001	0	0.142	0	0.002	0.02	0.01	0	0.01	0	0	0.017	0.008	0.006	0.002	0.009	0	0
TSI	HUOA-TSI-000005519	0	0.013	0	0.21	0.013	0	0.395	0.004	0.001	0.012	0.007	0.079	0	0	0	0.14	0	0	0.014	0	0	0.014	0.018	0.009	0.03	0	0.016	0	0.019	0.006	0
TSI	HUOA-TSI-000005520	0.007	0.017	0.017	0.179	0.036	0	0.358	0	0.008	0.014	0.031	0.053	0.007	0	0	0.155	0	0.008	0.033	0	0.001	0	0.003	0	0.011	0.013	0.011	0.002	0.013	0.003	0.02
TSI	HUOA-TSI-000005522	0.013	0.014	0.048	0.192	0.046	0.018	0.186	0.015	0	0.05	0.029	0.085	0.012	0.022	0	0.119	0.008	0.006	0.022	0.008	0.027	0.002	0.017	0.009	0.011	0.006	0.021	0	0.011	0.004	0
TSI	HUOA-TSI-000005523	0	0	0.004	0.046	0	0.011	0.902	0	0	0	0	0	0	0	0	0.032	0	0	0	0	0	0	0.004	0	0	0	0	0	0	0	0
TSI	HUOA-TSI-000005526	0.003	0.02	0.052	0.234	0.033	0.012	0.128	0	0	0.044	0.04	0.098	0	0	0.031	0.175	0.014	0.011	0.011	0.022	0	0.018	0.02	0.005	0.01	0.004	0.011	0.002	0	0.003	0
TSI	HUOA-TSI-000005528	0	0.011	0.032	0.179	0.055	0	0.293	0	0	0.052	0.011	0.093	0	0.011	0.004	0.129	0.01	0.011	0.034	0	0.017	0.003	0.012	0	0.009	0.004	0	0.011	0.004	0.017	0
TSI	HUOA-TSI-000005529	0.011	0.028	0.037	0.255	0.037	0.007	0.146	0	0	0.03	0.028	0.081	0.002	0.003	0	0.224	0	0.011	0.004	0.007	0.015	0.011	0.011	0.003	0.015	0.004	0.007	0	0.01	0.014	0
TSI	HUOA-TSI-000005530	0.025	0.013	0.049	0.208	0.009	0	0.257	0	0.008	0.049	0.003	0.054	0	0.013	0.024	0.155	0	0.008	0.022	0.004	0	0.005	0.008	0.001	0.02	0.016	0	0.013	0.017	0.007	0.013
TSI	HUOA-TSI-000011473	0.005	0.029	0.012	0.293	0.015	0	0.181	0.007	0	0.014	0.006	0.109	0.003	0	0	0.165	0	0.015	0.017	0.016	0.034	0.002	0.008	0.004	0.02	0	0.006	0.01	0.028	0.002	0
TSI	HUOA-TSI-000011474	0.014	0.042	0.007	0.202	0.045	0.005	0.268	0	0	0.006	0	0.039	0.008	0.003	0.03	0.169	0	0	0.021	0.005	0.043	0	0.014	0	0.021	0.011	0.012	0.009	0.025	0	0
TSI	HUOA-TSI-000011475	0.023	0.011	0.027	0.199	0.034	0.016	0.229	0.003	0.015	0.018	0.014	0.058	0.026	0	0.006	0.163	0	0.023	0.023	0.001	0.008	0.014	0.021	0.001	0.013	0.012	0.01	0.011	0.013	0.005	0.001
TSI	HUOA-TSI-000011476	0	0.014	0.094	0.233	0.038	0.026	0.111	0	0	0.038	0.017	0.127	0	0.008	0.005	0.137	0.016	0	0.01	0	0.039	0.012	0.018	0.007	0.005	0	0.013	0.013	0	0.02	0
TSI	HUOA-TSI-000011477	0.014	0.015	0.03	0.231	0.037	0	0.229	0	0.019	0.026	0.008	0.083	0	0.003	0	0.186	0	0.014	0.006	0	0	0.012	0	0.011	0.011	0.012	0	0.01	0.027	0.017	0
