# Supplementary material for: Exploring the complex population structure and admixture of four local Hungarian sheep breeds
Source: Front Genet. 2025 Mar 19;16:1507315. doi: 10.3389/fgene.2025.1507315 (PMC11962792; doi:10.3389/fgene.2025.1507315)
Supplement: Supplementary file 14 [file Table1.xlsx]

## Sheet: Foglio1
Supplementary Table 1. Breed and dataset information.
Breede code	Breed	#indiv	#individuals before filtering	type of tail	country	latitude	longitude	Dataset	Chip name	DAD-IS classification
BAT	Bábolna Tetra	25	27	long	Hungary	48.3992	20.8461	SMARTER	Illumina OvineSNP50 - Ovine Infinium® HD SNP	At Risk
BHC	Brecknock Hill Cheviot	23	24	long	United Kingdom	51.9787	-3.489	https://doi.org/10.1186/s12863-015-0216-x	Illumina OvineSNP50	Not at Risk
BOR	Boreray	14	17	long	United Kingdom	57.7167	-7.28333	https://doi.org/10.1371/journal.pbio.1001258	Illumina OvineSNP50	At Risk
BWM	Black Welsh Mountain	18	24	long	United Kingdom	51.9787	-3.489	https://doi.org/10.1186/s12863-015-0216-x	Illumina OvineSNP50	At Risk
CIK	Cikta	8	8	long	Hungary	47.6228	18.4529	https://doi.org/10.1186/s12711-020-00545-7	Illumina OvineSNP50	At Risk
DAL	Dalapäls	19	21	short	Sweden	61.3388	13.8601	https://doi.org/10.1186/s12863-020-0827-8	Ovine Infinium® HD SNP	At Risk
DLF_1	Danish landrace (Hulsig-Vesterbølle)	29	44	long	Denmark	57.6536	10.4322	https://doi.org/10.1080/09064702.2019.1639804	Illumina OvineSNP50	At Risk
DLF_2	Danish landrace (Ertebølle)	30	86	long	Denmark	56.8084	9.22995	https://doi.org/10.1080/09064702.2019.1639804	Illumina OvineSNP50	At Risk
DLW	Dolgellau Welsh Mountain	8	9	long	United Kingdom	51.9787	-3.489	https://doi.org/10.1186/s12863-015-0216-x	Illumina OvineSNP50	Unknown
FIN	Finnship	30	99	short	Finland	62	26	https://doi.org/10.1371/journal.pbio.1001258	Illumina OvineSNP50	Unknown
FJA	Fjällnäs	8	10	short	Sweden	67.9932	19.1798	https://doi.org/10.1186/s12863-020-0827-8	Ovine Infinium® HD SNP	At Risk
GAL	Galway sheep	30	49	long	Ireland	53.2667	-9.05	https://doi.org/10.1371/journal.pbio.1001258	Illumina OvineSNP50	At Risk
GOR	Polish Mountain	5	5	long	Poland	49.3835	20.1355	https://doi.org/10.1186/s12711-020-00545-7	Illumina OvineSNP50	Not at Risk
GOT	Gotland	19	19	short	Sweden	57.4795	18.3706	https://doi.org/10.1186/s12863-020-0827-8	Ovine Infinium® HD SNP	Not at Risk
GUT	Gute	22	22	short	Sweden	57.3595	18.4306	https://doi.org/10.1186/s12863-020-0827-8	Ovine Infinium® HD SNP	At Risk
HLR	Hill Radnor	19	21	long	United Kingdom	51.9787	-3.489	https://doi.org/10.1186/s12863-015-0216-x	Illumina OvineSNP50	At Risk
HMF	Headed Marsh sheep	30	129	long	Denmark	56.7084	9.4078	https://doi.org/10.1080/09064702.2019.1639804	Illumina OvineSNP50	At Risk
HRR	Hortobágyi Racka	25	28	long	Hungary	46.8486	17.6061	SMARTER	Illumina OvineSNP50	At Risk
ICL	Icelandic landrace	30	54	short	Iceland	64.7	-21.23	Bioproject_id: PRJCA001253	Ovine Infinium® HD SNP	Not at Risk
KAM	Kamieniec	6	6	long	Poland	53.6206	20.2961	https://doi.org/10.1186/s12711-020-00545-7	Illumina OvineSNP50	At Risk
KLO	Klövsjö	19	21	short	Sweden	62.8612	14.2216	https://doi.org/10.1186/s12863-020-0827-8	Ovine Infinium® HD SNP	At Risk
LLW	Llanwenog	16	22	long	United Kingdom	51.9787	-3.489	https://doi.org/10.1186/s12863-015-0216-x	Illumina OvineSNP50	At Risk
LLY	Lleyn	17	22	long	United Kingdom	51.9787	-3.489	https://doi.org/10.1186/s12863-015-0216-x	Illumina OvineSNP50	Not at Risk
MER	Australian Merino	30	50	long	Spain			Pedrosa et al. 2007, GSE 39, 91-1-3	Illumina OvineSNP50
MIR	Iranian Mouflon - Ovis orientalis	6	10	short	Iran	38.9317	45.3852	https://doi.org/10.1038/s41598-017-07382-7	Illumina OvineSNP50	Unknown
NSP	Old Norwegian Spaelsau	15	15	short	Norway	60	8.5	https://doi.org/10.1371/journal.pbio.1001258	Illumina OvineSNP50	Not at Risk
NWI	Norwegian White Spaelsau	23	24	short	Norway	62.6	9.67	https://doi.org/10.1371/journal.pbio.1001258	Illumina OvineSNP50	Not at Risk
OUE	Ouessant	18	18	short	France	48.4581	-5.0956	https://zenodo.org/records/237116#.XlUezRdG3OQ	Ovine Infinium® HD SNP	Not at Risk
RAK	Racka	6	10	long	Hungary	46.6228	18.4529	https://doi.org/10.1038/s41598-017-07382-7	Illumina OvineSNP50	At Risk
ROM	Romanov	25	80	short	Russia	51.9461	41.3847	Bioproject_id: PRJCA001253	Ovine Infinium® HD SNP	Not at Risk
SBF	Scottish Black face	30	57	long	United Kingdom	55.75	-3.35	https://doi.org/10.1186/s12863-015-0216-x	Illumina OvineSNP50	Unknown
SOA	Soay	30	110	short	United Kingdom	57.15	-6.23333	https://doi.org/10.1186/s12863-015-0216-x	Illumina OvineSNP50	At Risk
SWH	Spael-white	28	32	short	Norway	60	8.6	https://doi.org/10.1371/journal.pbio.1001258	Illumina OvineSNP50	Not at Risk
SWW	South Wales Welsh Mountain	17	18	long	United Kingdom	51.9787	-3.489	https://doi.org/10.1186/s12863-015-0216-x	Illumina OvineSNP50	Unknown
TEX	Texel	30	59; 24	short	The Netherland; France			Bioproject_id: PRJCA001253; http://en.france-genetique-elevage.org/Texel,398.html	Ovine Infinium® HD SNP
TSI	Tsigai	26	34	long	Hungary	7.57667	21.5794	SMARTER	Illumina OvineSNP50	Not at Risk
TWM	Talybont Welsh Mountain	23	24	long	United Kingdom	51.9787	-3.489	https://doi.org/10.1186/s12863-015-0216-x	Illumina OvineSNP50	Unknown
VAL	Valachian	6	6	long	Czechia	49.19	16.61	https://doi.org/10.1186/s12711-020-00545-7	Illumina OvineSNP50	At Risk
