# Supplementary material for: Exploring the complex population structure and admixture of four local Hungarian sheep breeds
Source: Front Genet. 2025 Mar 19;16:1507315. doi: 10.3389/fgene.2025.1507315 (PMC11962792; doi:10.3389/fgene.2025.1507315)
Supplement: Supplementary file 17 [file Table5.xlsx]

## Sheet: GCS scores
Supplementary Table 4. GCS scores (NetView analysis).
ID	GCS
FJA	0.896723085274109
FJA	0.895507840851809
FJA	0.886193655226775
FJA	0.881577959378638
MIR	0.851423543244466
BOR	0.846602421698283
MIR	0.844977769519318
OUE	0.834424081234995
BOR	0.833556094029496
BOR	0.833379628752747
MIR	0.829810309842916
DAL	0.827368264586091
BOR	0.824958905018451
BOR	0.819688597685271
DAL	0.818572093194782
DAL	0.818509554390869
BOR	0.817501144597488
MIR	0.815653762642465
OUE	0.815583845288925
KLO	0.815337691728622
DAL	0.814558928229257
DAL	0.814318201791035
DAL	0.813961636765881
DAL	0.813592919703778
FJA	0.812612077942029
OUE	0.812547240031364
OUE	0.811736391198164
OUE	0.811079897236337
BOR	0.810244252890863
OUE	0.810227882542656
DAL	0.80972422961969
DAL	0.80890891284525
BOR	0.808349164437598
BOR	0.80707177421903
KLO	0.806772689536444
KLO	0.80672942975236
OUE	0.80581436355577
KLO	0.805076953545056
OUE	0.803789987172248
SOA	0.802568680875635
KLO	0.801266375180226
OUE	0.798553116397701
DAL	0.798367528415439
SOA	0.798087346475364
OUE	0.797534282675513
KLO	0.797402447835329
DAL	0.795957632247342
SOA	0.795356482783601
SOA	0.794728509225667
SOA	0.794590897051846
OUE	0.794204801549883
KLO	0.793904950813885
SOA	0.793734625661179
DAL	0.79358548917775
DAL	0.793579083201236
KLO	0.793400658926899
SOA	0.793277270794551
SOA	0.792522733840468
SOA	0.792311316148495
SOA	0.791910750039105
SOA	0.791305280284556
SOA	0.791273231750329
SOA	0.79079546811624
SOA	0.790461487636351
OUE	0.790452756095368
SOA	0.789796970235343
SOA	0.789725158953389
DAL	0.789273840770173
HMF	0.789105922830403
KLO	0.788916043691078
SOA	0.788684360077695
GUT	0.788654050226141
SOA	0.788020709518862
DLF_2	0.787322742860199
TSI	0.787316200936845
SOA	0.787237299051066
SOA	0.78711199725807
KLO	0.787022909851319
SOA	0.787002995236824
SOA	0.786865940506047
GUT	0.785836706139745
SOA	0.78583378416289
DLF_2	0.785248679714807
GUT	0.785112879542782
HMF	0.784771752819899
KLO	0.784728191159527
SOA	0.78469488560041
DLF_2	0.784475603503878
DLF_2	0.783588187276001
DAL	0.783490662156605
SOA	0.783280394844124
GUT	0.782624934241815
HMF	0.782591415263066
SOA	0.782217237334489
SOA	0.782213929793196
SOA	0.781912446180095
TSI	0.78134932318455
HMF	0.781202440844188
GUT	0.781167711846244
TWM	0.781080933308847
SOA	0.780308344929259
HMF	0.780051010470832
GUT	0.77981219778278
GUT	0.779753069497214
HMF	0.779741546728868
SWW	0.779634793953214
BWM	0.779356293179072
GUT	0.778952111939869
TWM	0.778523963299334
SOA	0.777620052674421
GUT	0.777215028128847
KLO	0.776872145596657
GUT	0.776851153777006
BWM	0.776759462236474
BOR	0.776583694391059
GUT	0.776418033432503
DLF_2	0.776138815209924
TWM	0.776012223749719
HMF	0.775828568356843
BWM	0.775824578482936
TWM	0.775774381514909
KLO	0.775660791805482
DAL	0.775537878502037
DLF_2	0.774891936770281
SWW	0.774817247023983
DLF_2	0.774239076707568
SWW	0.773790424730539
HMF	0.773758330447665
TWM	0.773722411187301
GUT	0.773584848964717
GUT	0.773384099208453
GUT	0.773320496495424
BWM	0.773256456940667
GUT	0.773194412384337
OUE	0.773106300028779
DLF_1	0.773029400781743
DLF_2	0.772856846565958
GUT	0.772822947532805
HMF	0.772690100500124
KLO	0.772266944509976
HMF	0.772261301654236
GUT	0.772260458357047
GUT	0.771292223562274
ROM	0.771036705214394
BWM	0.770932049789053
BOR	0.770805842515369
HMF	0.770560829815199
OUE	0.769372180091423
HMF	0.76914211195734
TWM	0.769087885836705
OUE	0.768761680800136
GUT	0.768733088517462
TSI	0.768659293589699
KLO	0.768025195376431
DLF_2	0.767590813723886
DLF_2	0.767557284750913
TWM	0.76735692270902
DLF_2	0.767314037753798
SWW	0.766294722286725
HMF	0.766151298069383
OUE	0.765777634529009
DLF_1	0.765258515736114
KLO	0.765222594598344
GUT	0.765130421700154
TSI	0.764833369802351
BWM	0.764466948557077
KLO	0.764324252059775
DLF_1	0.763989799356113
BWM	0.763783201708258
HMF	0.763730488272094
ROM	0.763668045569086
ROM	0.763465937511417
GAL	0.763288233649491
GUT	0.763220166680053
GAL	0.762447232008512
LLY	0.762368679587599
SWW	0.761773404285877
HMF	0.761721361891909
TWM	0.760592568002963
ROM	0.760443442949456
DAL	0.760391946809278
HMF	0.760293735451825
ICL	0.760231431276197
HLR	0.760125498944198
DLF_1	0.760000024015503
ROM	0.759952318863578
ROM	0.75991966609524
OUE	0.759819290036043
TWM	0.759701836799771
HLR	0.759477066241186
TWM	0.75947703518762
TSI	0.759459084426296
ICL	0.758682456221081
DLF_1	0.758611116851882
TEX	0.758524187295883
ICL	0.758409007829114
LLW	0.758302483239463
ROM	0.758289879110355
GOT	0.758228851680234
HMF	0.758159590474535
ROM	0.75778799806797
LLY	0.757770376571065
BWM	0.757752043081034
TSI	0.757718952508017
HLR	0.757709049084988
LLY	0.75754993365159
GOT	0.75750830895015
LLW	0.757493219024743
SWW	0.757451726307097
LLW	0.757343233895322
TWM	0.75731136045985
GUT	0.757278058444285
ICL	0.757243982876584
DLF_2	0.757050988894149
BWM	0.756893098197482
TWM	0.75646715698395
HMF	0.756464267040655
DLF_1	0.756445356453551
GOT	0.756363260477758
TSI	0.756241711078906
GOT	0.756131122928489
BWM	0.755992500017871
ROM	0.755921225359727
DLF_2	0.755772803607163
LLY	0.755480755173462
TSI	0.755394714199375
DLF_1	0.755228615417341
GOT	0.754930589918781
DLF_1	0.754874922749596
GOT	0.754622734923555
ICL	0.754597234451134
ICL	0.75450044562652
DLF_1	0.754323480757372
TSI	0.754269622628188
LLW	0.754167518588428
GOT	0.753802840219694
DLF_2	0.753723337290194
GAL	0.753656602602387
BWM	0.753462159297882
DLF_2	0.753109085318771
ICL	0.753103951469177
LLW	0.753024042724508
LLY	0.752654502658212
GOT	0.75241404864024
KLO	0.752253896333546
LLY	0.751943382931233
LLW	0.751931667137699
ICL	0.75173208715519
HMF	0.751496351546852
DLF_2	0.751410846672775
HMF	0.751248051911623
GAL	0.751127413404699
ICL	0.750944461220485
HLR	0.750528627113704
TEX	0.750518777666055
GAL	0.750410738752681
DLF_1	0.750320540383391
DLF_2	0.750292248166181
ROM	0.750285868442381
HLR	0.749845082298036
DLF_1	0.749687976707753
LLY	0.749656541509638
ICL	0.749123073201967
LLY	0.748852543440166
LLW	0.748759873002836
ROM	0.748585423706018
ROM	0.7483815546595
ROM	0.748048678961626
DLF_1	0.74768276208014
HMF	0.747577558131838
SWW	0.747469336664004
DLF_2	0.747450322381218
LLY	0.747407012215713
GAL	0.747241686664511
LLW	0.747165813891209
ICL	0.747123909221931
HLR	0.746698365054146
ICL	0.746560739820412
ICL	0.746557511698035
DLF_2	0.746361863992211
DLF_2	0.746315378007218
TWM	0.746184276802867
LLY	0.746159848641424
HLR	0.745808773592379
GOT	0.745262907358819
HMF	0.744960451133852
DLF_2	0.744917186401321
ICL	0.744791906192841
DLF_2	0.744693636919316
LLY	0.744663234214695
ROM	0.744559370467006
GAL	0.74450251496306
DLF_2	0.744492211713927
LLW	0.744405581938676
GOT	0.744401287367812
HMF	0.744351425238618
TSI	0.744323313098701
GOT	0.744225063122005
GOT	0.744039772078831
LLW	0.743788278188547
HLR	0.743770769814811
HMF	0.743741876041362
ICL	0.743538898333222
TEX	0.743231940518673
TEX	0.743053965342671
DLF_2	0.742793767610412
LLW	0.742649982390777
DLF_1	0.742600865213353
LLY	0.742484637715035
LLY	0.742418748980375
GAL	0.742407719321492
HMF	0.742264270593427
GAL	0.742168326734287
ICL	0.742079713238753
HLR	0.741980605661799
DLF_2	0.741844204086591
TSI	0.741566277703312
GAL	0.74148161757619
DLF_2	0.741396703103228
GOT	0.741383802425167
TEX	0.741298793083692
GAL	0.741068209682025
DLF_2	0.740908554384735
SWW	0.740797028584341
TEX	0.74074855204957
BWM	0.740645395633114
GOT	0.740614168400196
GOT	0.740370475229198
SBF	0.74028630307683
LLY	0.740280018684899
SWH	0.739826209788023
GAL	0.739806986762746
SWH	0.739785872321171
TEX	0.739640829841813
GAL	0.739638106900084
TEX	0.739597156445895
LLW	0.738549142088607
GAL	0.738397436155026
GOT	0.73838183321997
ROM	0.738289018151471
SWH	0.738134423258027
SWH	0.738072387482516
HRR	0.737971199382303
DLF_2	0.737964191775752
GOT	0.737832874877739
DLF_1	0.737652079313617
LLW	0.737597989706826
GAL	0.737515940498861
SWH	0.737379982328095
GAL	0.73724364612189
GAL	0.737144313089682
LLW	0.736948460444454
GAL	0.736923689789389
SWH	0.736807479277821
LLW	0.736791105446816
SWH	0.736624950403884
TEX	0.736547658793698
ROM	0.736389453278906
GAL	0.736311362847843
GAL	0.736300691665997
DLF_2	0.73625341867807
ROM	0.736106273314438
SBF	0.735839809709321
HLR	0.735766295154369
LLW	0.735601869239335
DLF_1	0.735466492728003
HRR	0.735427622905057
GOT	0.73529813947991
SWH	0.735282013201566
GAL	0.735218150399223
HRR	0.734665748962291
SBF	0.734582158152182
GAL	0.734524011097138
TSI	0.734521911748678
SWH	0.734340774814415
BOR	0.734312236742559
GAL	0.734305382331876
HRR	0.734004352931798
SWH	0.733972182444175
SWH	0.733911123580414
HRR	0.7338472898011
SWH	0.733787722956309
HRR	0.733628037056711
GAL	0.733359139411381
SWW	0.733330438359922
HLR	0.733207495536368
HLR	0.733175370855527
DLF_2	0.733107981516792
TEX	0.732906894161642
BOR	0.732871183912926
DLF_2	0.732864345420083
DLF_1	0.732732622431156
TWM	0.73273158629549
HLR	0.732728566336589
HLR	0.732707267450208
GAL	0.732655687811814
SWW	0.732654132080281
GOT	0.732549506805424
TWM	0.732524917384656
SWH	0.732413144464701
BWM	0.732136526860308
SWW	0.732054579681292
DLF_2	0.731989210536885
SBF	0.731917971060106
SWH	0.731824841001506
SWH	0.731803133967735
SWH	0.731756255773798
ROM	0.731596425557721
TEX	0.731515275576091
SBF	0.731497274444758
SWH	0.731377002099768
SWH	0.73135072415019
TEX	0.731286899648076
SBF	0.731133317825626
TWM	0.7307809097198
SWH	0.7307433792371
TWM	0.730710403976562
TEX	0.73064678560177
DAL	0.730642705200497
HRR	0.730215260364889
HRR	0.73012813621485
TEX	0.730033316718716
DLF_2	0.73000526498899
FIN	0.729983426659135
SWW	0.729893982705568
SWH	0.729713101801698
HRR	0.729660758398795
OUE	0.729612340876878
SBF	0.729520994156335
BWM	0.729476474303036
BWM	0.729428670300091
GAL	0.729270844035027
SWH	0.729109272587172
SWW	0.729079902781423
HRR	0.728987638657761
TEX	0.728844446768681
TEX	0.728654741753347
HRR	0.728555674408432
HMF	0.728411419382198
GAL	0.728401211191611
SWH	0.728349341572933
MIR	0.728337503130682
HRR	0.728322088408124
TEX	0.728318922051173
TWM	0.72830268278846
HMF	0.728286790178646
HRR	0.72825248614777
NWI	0.728198712888077
ROM	0.728125921399787
HLR	0.727928695112812
DLF_2	0.72788347802406
TEX	0.727774172603867
SWH	0.727696761363401
BOR	0.727539047567403
FIN	0.727225952944371
HRR	0.727176962697616
TEX	0.72715345521635
SWH	0.726873980992002
TEX	0.726633364478973
ICL	0.72650417420999
GAL	0.726428415823562
NWI	0.726255763795671
SWH	0.725665718798589
DLF_2	0.725607718225957
FIN	0.725576684116264
BWM	0.725369328498182
HRR	0.725235189169284
TWM	0.725171846373984
TWM	0.72509034714498
FIN	0.724911109930411
SWW	0.724753088493501
NWI	0.724507907077077
DLF_2	0.72443476881979
NWI	0.724429668700075
KLO	0.724373240108371
TEX	0.724064954991706
SBF	0.723944416445416
SWW	0.723654392815885
DLF_2	0.723616568306156
HMF	0.723607054370787
HMF	0.723593727351403
GAL	0.723558884043884
SBF	0.723355834283719
FIN	0.723338521413766
SWH	0.723033497129209
HLR	0.722655213186935
SWH	0.722451378618732
FIN	0.722387503043509
HLR	0.72235851821702
SBF	0.72213760054715
HMF	0.721957667432285
TEX	0.721948331431171
SBF	0.721801394700508
NWI	0.721524873528558
HRR	0.721380101380181
FIN	0.721127638584234
TWM	0.720742272594225
NWI	0.720569525587715
FIN	0.720559341995178
HRR	0.720460264146657
FIN	0.720428472780495
TEX	0.720134669901759
FIN	0.719936425140917
TEX	0.719883243628049
RAK	0.719721666095332
ICL	0.719719418983712
RAK	0.719657157167634
FIN	0.719645739723994
NWI	0.719585365349154
GAL	0.719524238197105
TWM	0.719520803439097
FIN	0.719514573280418
LLY	0.719503832371896
FIN	0.719469909640973
FIN	0.719088117608279
ROM	0.719057916269914
RAK	0.718910153663017
FIN	0.718839129261366
FIN	0.718657297704369
ICL	0.718544137498525
FIN	0.718513265277271
RAK	0.718140454560981
NWI	0.718112043061092
FIN	0.718048220744036
ROM	0.717816923325097
SBF	0.717691293445288
NWI	0.717550456620768
ROM	0.717398110236977
FIN	0.717392980695538
SBF	0.717166389483244
SWH	0.717092169352067
SBF	0.716775782493323
SWW	0.716725633289373
NWI	0.716508732297179
NWI	0.716484630117735
NWI	0.716372097551501
FIN	0.71621488778184
FIN	0.716214041123155
RAK	0.716032768157051
MER	0.715962555620161
SBF	0.715919598550472
NWI	0.715881684551833
NWI	0.715590104848246
HRR	0.715191454223144
NWI	0.715161562495819
ICL	0.715137046088461
RAK	0.715125872124028
HLR	0.715095072839047
ICL	0.715019055905348
NWI	0.715006267754924
DLF_2	0.714893982246531
HRR	0.714366978846706
ICL	0.714266404463586
TWM	0.713379329463655
MER	0.713214487622444
HRR	0.713192592003349
FIN	0.713125799906871
DLF_2	0.713106560688856
HRR	0.713065764499047
ICL	0.713036994661916
HRR	0.712880738421525
SBF	0.712777573344556
SBF	0.712770755835695
ROM	0.712335386908335
FIN	0.712200248560595
ROM	0.712148875081468
NWI	0.712148570344228
NWI	0.711856716167524
MER	0.711811154354708
NWI	0.711524467559944
ROM	0.711495612044599
SWW	0.711431993895235
NWI	0.711405590933421
BWM	0.711218175035115
TSI	0.711210991640102
SBF	0.711190136097757
SBF	0.711188263450259
SBF	0.711144063380927
HRR	0.710978499359257
SBF	0.710956939308182
BWM	0.710727395737368
SBF	0.710722174776368
NSP	0.710346549537097
DLF_2	0.71022991277348
NSP	0.710220064979397
SBF	0.710195139431762
HLR	0.710177968012049
FIN	0.710162862506574
NWI	0.710077233560943
NWI	0.710068028349366
SBF	0.709894516505069
NSP	0.708846139142674
ICL	0.708791218049111
ICL	0.708555723198013
HRR	0.708461397028581
SBF	0.707881326735599
HRR	0.707779543604104
ICL	0.707599772100902
NWI	0.706750515095525
SBF	0.706493134085926
FIN	0.706468286576683
TEX	0.70638700756513
FIN	0.706348452197355
ICL	0.706327807275834
FIN	0.706178684800634
TEX	0.705853189401651
BAT	0.705836893829063
NSP	0.705321799314424
DLF_2	0.705261306565725
FIN	0.705254665137268
MER	0.705115844452173
BAT	0.705053998495692
SBF	0.704900071478605
TEX	0.7047679359681
ICL	0.704617818606717
NSP	0.703961895790196
ICL	0.703541083863615
TSI	0.703236935404102
BHC	0.70302878316635
SBF	0.702889748232226
FIN	0.702735628761152
SBF	0.702505697485051
BHC	0.702486999297241
BHC	0.702438112797109
MER	0.702153123641319
SBF	0.701995839048269
BAT	0.701887001655427
TEX	0.70187384214426
BHC	0.701868801062633
NSP	0.701720511377669
BHC	0.701610115391207
NSP	0.70147816333075
NSP	0.701234808709824
BHC	0.701096029420289
TEX	0.700953492145356
BAT	0.700944558699726
TEX	0.700837291377569
LLY	0.70067512804169
NSP	0.700599369227231
BHC	0.700545802924793
BAT	0.700544774874758
BHC	0.700446120202
BHC	0.699832222417111
ICL	0.699477182867056
BAT	0.699410290118432
BAT	0.699246675183056
BAT	0.699019542947205
BHC	0.699006599596217
MER	0.698725325290934
DLF_2	0.698571895697796
NSP	0.698556785020563
BAT	0.698514553794528
BHC	0.698431097918194
NSP	0.698048385317513
MER	0.697955381902353
BHC	0.697942378847755
MER	0.697686284754681
BHC	0.697576105496356
BAT	0.697558282489068
BHC	0.697160569711002
BHC	0.697135819060885
MER	0.696913937440454
BAT	0.696779922838104
MER	0.696519410434028
BHC	0.696186373583528
LLY	0.696075061756624
BAT	0.69563967755015
BHC	0.695556336619869
DAL	0.695383294850998
BAT	0.695335323183926
BAT	0.695325666687836
BAT	0.695200634322268
BAT	0.695019084045151
BAT	0.69474003063533
MER	0.694492872376413
BAT	0.694450873364249
BAT	0.694056184388988
MER	0.693952153308708
BAT	0.693945888858535
BHC	0.693932525711845
MER	0.693787825569728
BAT	0.69329612885147
BHC	0.693239763349047
BHC	0.693158677397716
TSI	0.693055563740416
BHC	0.69292891586446
FIN	0.69280306809986
MER	0.692646552088347
MER	0.691530489701053
TSI	0.690612770618944
MER	0.690239623387149
BHC	0.690177093701399
BAT	0.689646238805615
BAT	0.689210070778262
BAT	0.688955480422232
TSI	0.688545422025138
MER	0.688380859422803
BHC	0.688291038101176
BAT	0.688171467415421
MER	0.687914607045427
MER	0.68729913616965
MER	0.687263486558782
MER	0.6870340487692
TSI	0.686910514484478
TSI	0.686902007176826
TSI	0.685452197476792
TSI	0.685148885088146
MER	0.685084971902999
TSI	0.684588817695241
NSP	0.684538052117727
TSI	0.684482652356483
MER	0.684422318478366
MER	0.684001908242009
KAM	0.683694055569458
DLW	0.683642695472811
CIK	0.682885103371548
CIK	0.682696851404829
CIK	0.681763014820259
MER	0.681546058128273
GOR	0.681414988185778
KAM	0.681013225772725
DLW	0.680958990036481
DLW	0.680914459788853
DLW	0.680822257276485
DLW	0.680724975009232
DLW	0.680448380241754
KAM	0.680313170570649
GOR	0.680217192489654
MER	0.68006059032989
MER	0.679672810140726
GOR	0.679445612976209
DLW	0.679352377924349
CIK	0.679240433023045
GOR	0.679232207725235
NSP	0.678800333877358
CIK	0.678763619297598
KAM	0.678671130091075
GOR	0.677931197622876
MER	0.677749208956325
DLW	0.677415409929031
KAM	0.677093146444308
CIK	0.676963476512621
CIK	0.674834054060101
NSP	0.674802619045859
NSP	0.674486863715964
TSI	0.674109940457058
CIK	0.672117095025713
KAM	0.671012109538187
TSI	0.668119910894136
MER	0.667130697316862
MIR	0.66651016072169
VAL	0.665383788722771
VAL	0.665090955449566
VAL	0.663788406129279
MER	0.662906532623292
DLF_2	0.662531993060164
FJA	0.661884887104085
FJA	0.660546184376722
VAL	0.659204542811311
VAL	0.658797548468038
VAL	0.655569487173464
TSI	0.653328176032012
FJA	0.650075984791532
